# Supplementary material for: The Association between the Gut Microbiome and Development and Progression of Cancer Treatment Adverse Effects
Source: MDPI journal article supplement (doi:10.3390/cancers15174301), 2023-08-28
Supplement: s1 [file s1]

Supplementary Table S1: Key search terms used during the semi-structured literature search for relevant papers in the PubMed, Embase, Emcare, and Cochrane databases.

| Participants                                                                                                                                                                                                                                | Studies                                                                                                                                                                       | Gut microbiome                                                                                                                                                                                                                                                                    | Adverse effects                                                                                                                                                                                                                                                                                                                                                                                                                                                                                     | Cancer treatments                                                                                                                                                                                                                                                                                                                                                                                          |
|---------------------------------------------------------------------------------------------------------------------------------------------------------------------------------------------------------------------------------------------|-------------------------------------------------------------------------------------------------------------------------------------------------------------------------------|-----------------------------------------------------------------------------------------------------------------------------------------------------------------------------------------------------------------------------------------------------------------------------------|-----------------------------------------------------------------------------------------------------------------------------------------------------------------------------------------------------------------------------------------------------------------------------------------------------------------------------------------------------------------------------------------------------------------------------------------------------------------------------------------------------|------------------------------------------------------------------------------------------------------------------------------------------------------------------------------------------------------------------------------------------------------------------------------------------------------------------------------------------------------------------------------------------------------------|
| "neoplasms"<br>[mh] OR<br>Cancer*[tw] OR<br>leukaemia[tw]<br>OR leukemia[tw]<br>OR oncolog*[tw]<br>OR tumor*[tw]<br>OR Tumour*[tw]<br>OR<br>carcinoma*[tw]<br>OR non-<br>squamous cell<br>carcinoma [tw]<br>OR NSCC[tw] OR<br>neoplasm*[tw] | Clinical<br>trial[pt]<br>OR<br>interven*<br>[tw] OR<br>trial [tw]<br>OR<br>"randomi<br>sed<br>control<br>trial" [tw]<br>OR "pilot<br>stud*" [tw] OR<br>"cohort<br>stud*" [tw] | "Gastrointestinal<br>Microbiome"[mh]<br>OR gut<br>microbio*[tw] OR<br>gut<br>microbiome*[tw] OR<br>gut flora[tw] OR<br>gastric<br>microbio*[tw] OR<br>intestinal flora[tw]<br>OR intestinal<br>microbiota*[tw] OR<br>enteric bacteria[tw]<br>OR gastrointestinal<br>microbio*[tw] | "mucositis"[mh] OR<br>"fatigue"[mh:noexp] OR<br>"Diarrhea"[mh:noexp] OR<br>"cognitive dysfunction"[mh] OR<br>"anxiety"[mh] OR "depression"[mh]<br>OR "mental health"[mh] OR "cancer<br>cachexia" [tw] OR fatigue[tw] OR<br>mucositis[tw] OR GIT mucositis[tw]<br>OR gastrointestinal mucositis[tw]<br>OR oral mucositis[tw] OR<br>diarrhoea[tw] OR diarrhea[tw] OR<br>psychoneurological[tw] OR<br>cognit*[tw] OR "fear of<br>recurrence"[tw] OR anxiet*[tw] OR<br>depres*[tw] OR mental health[tw] | "Induction Chemotherapy"[mh]<br>OR "Induction<br>Chemotherapy/adverse<br>effects"[mh] OR "Chemotherapy,<br>Adjuvant"[mh] OR<br>"Chemotherapy,<br>Adjuvant/adverse effects"[mh] OR<br>"maintenance<br>chemotherapy"[mh] OR<br>"maintenance<br>chemotherapy/adverse<br>effects"[mh] OR<br>"radiotherapy"[mh] OR<br>"immunotherapy"[mh] OR<br>chemotherap*[tw] OR<br>radiotherap*[tw] OR<br>immunotherap*[tw] |
